# Supplementary material
Source: bioRxiv or medRxiv preprint supplement (https://www.biorxiv.org/highwire/filestream/56759/field_highwire_adjunct_files/0/187369-1.pdf)
Supplement: Supplementary file [file 187369-1.pdf]

**Table S1.** Mean and standard deviation [SD] of the measured traits in each population.

| Population      | Sex                  | Standing Height |        |        | Sitting Height |       |       | Sitting/Standing Ratio |        |        | Subischial Leg Length |       |       | BMI  |       |       |      |
|-----------------|----------------------|-----------------|--------|--------|----------------|-------|-------|------------------------|--------|--------|-----------------------|-------|-------|------|-------|-------|------|
|                 |                      | N               | mean   | SD     | N              | mean  | SD    | N                      | mean   | SD     | N                     | mean  | SD    | N    | mean  | SD    |      |
| Pygmies         | Central/Eastern Baka | all             | 35     | 149.04 | 5.49           | 35    | 78.01 | 2.77                   | 35     | 0.5236 | 0.0110                | 35    | 71.03 | 3.54 | 34    | 19.43 | 1.83 |
|                 |                      | males           | 17     | 152.38 | 4.60           | 17    | 79.63 | 2.25                   | 17     | 0.5227 | 0.0087                | 17    | 72.75 | 3.00 | 17    | 19.96 | 1.58 |
|                 |                      | females         | 18     | 145.88 | 4.33           | 18    | 76.48 | 2.33                   | 18     | 0.5244 | 0.0130                | 18    | 69.40 | 3.29 | 17    | 18.90 | 1.94 |
|                 | Southeastern Baka    | all             | 9      | 157.17 | 7.22           | 9     | 82.27 | 3.87                   | 9      | 0.5236 | 0.0139                | 9     | 74.90 | 4.46 | 9     | 20.76 | 1.11 |
|                 |                      | males           | 8      | 157.11 | 7.72           | 8     | 81.90 | 3.96                   | 8      | 0.5215 | 0.0132                | 8     | 75.21 | 4.66 | 8     | 20.60 | 1.08 |
|                 |                      | females         | 1      | 157.60 | –              | 1     | 85.20 | –                      | 1      | 0.5406 | –                     | 1     | 72.40 | –    | 1     | 22.02 | –    |
|                 | Koya                 | all             | 22     | 152.48 | 7.54           | 22    | 78.73 | 3.70                   | 22     | 0.5167 | 0.0188                | 22    | 73.75 | 5.57 | 22    | 20.85 | 2.18 |
|                 |                      | males           | 14     | 155.19 | 7.49           | 14    | 80.06 | 3.71                   | 14     | 0.5164 | 0.0210                | 14    | 75.12 | 5.93 | 14    | 20.85 | 1.76 |
|                 |                      | females         | 8      | 147.75 | 5.13           | 8     | 76.39 | 2.37                   | 8      | 0.5173 | 0.0155                | 8     | 71.36 | 4.19 | 8     | 20.86 | 2.91 |
| Southern Bezan  | all                  | 8               | 156.63 | 7.42   | –              | –     | –     | –                      | –      | –      | –                     | –     | –     | 8    | 20.23 | 2.47  |      |
|                 | males                | 6               | 156.62 | 6.49   | –              | –     | –     | –                      | –      | –      | –                     | –     | –     | 6    | 19.45 | 2.07  |      |
|                 | females              | 2               | 156.65 | 13.22  | –              | –     | –     | –                      | –      | –      | –                     | –     | –     | 2    | 22.56 | 2.65  |      |
| Central Bongo   | all                  | 4               | 153.00 | 4.97   | 4              | 81.75 | 1.26  | 4                      | 0.5345 | 0.0099 | 4                     | 71.25 | 3.77  | 4    | 20.50 | 1.41  |      |
|                 | males                | 4               | 153.00 | 4.97   | 4              | 81.75 | 1.26  | 4                      | 0.5345 | 0.0099 | 4                     | 71.25 | 3.77  | 4    | 20.50 | 1.41  |      |
|                 | females              | –               | –      | –      | –              | –     | –     | –                      | –      | –      | –                     | –     | –     | –    | –     | –     |      |
| Southern Bongo  | all                  | 14              | 156.29 | 5.34   | 14             | 80.36 | 2.06  | 14                     | 0.5145 | 0.0157 | 14                    | 75.93 | 4.65  | 14   | 20.98 | 2.25  |      |
|                 | males                | 9               | 159.44 | 3.43   | 9              | 81.00 | 1.73  | 9                      | 0.5082 | 0.0130 | 9                     | 78.44 | 3.40  | 9    | 20.68 | 2.29  |      |
|                 | females              | 5               | 150.60 | 2.51   | 5              | 79.20 | 2.28  | 5                      | 0.5259 | 0.0144 | 5                     | 71.40 | 2.70  | 5    | 21.53 | 2.30  |      |
| Eastern Bongo   | all                  | 23              | 155.70 | 7.01   | 23             | 80.72 | 2.55  | 23                     | 0.5189 | 0.0159 | 23                    | 74.98 | 5.45  | 23   | 19.60 | 2.63  |      |
|                 | males                | 15              | 157.13 | 7.68   | 15             | 81.03 | 2.92  | 15                     | 0.5161 | 0.0144 | 15                    | 76.10 | 5.59  | 15   | 19.41 | 2.57  |      |
|                 | females              | 8               | 153.00 | 4.86   | 8              | 80.13 | 1.66  | 8                      | 0.5241 | 0.0184 | 8                     | 72.88 | 4.82  | 8    | 19.96 | 2.88  |      |
| Non-Pygmies     | Bangando             | all             | 5      | 157.32 | 5.48           | 5     | 82.46 | 2.72                   | 5      | 0.5242 | 0.0045                | 5     | 74.86 | 2.92 | 5     | 20.78 | 2.01 |
|                 |                      | males           | 2      | 163.30 | 0.99           | 2     | 85.35 | 0.35                   | 2      | 0.5227 | 0.0010                | 2     | 77.95 | 0.64 | 2     | 22.87 | 0.07 |
|                 |                      | females         | 3      | 153.33 | 0.21           | 3     | 80.53 | 0.91                   | 3      | 0.5252 | 0.0061                | 3     | 72.80 | 0.95 | 3     | 19.38 | 0.88 |
|                 | Nzime                | all             | 20     | 156.55 | 8.72           | 20    | 79.52 | 4.35                   | 20     | 0.5081 | 0.0141                | 20    | 77.03 | 5.33 | 20    | 20.44 | 3.20 |
|                 |                      | males           | 2      | 174.25 | 5.30           | 2     | 86.90 | 1.56                   | 2      | 0.4988 | 0.0062                | 2     | 87.35 | 3.75 | 2     | 17.97 | 1.82 |
|                 |                      | females         | 18     | 154.58 | 6.51           | 18    | 78.69 | 3.73                   | 18     | 0.5092 | 0.0144                | 18    | 75.88 | 4.12 | 18    | 20.71 | 3.23 |
|                 | Tikar                | all             | 19     | 162.24 | 7.90           | –     | –     | –                      | –      | –      | –                     | –     | –     | –    | 19    | 22.99 | 2.28 |
|                 |                      | males           | 12     | 166.68 | 3.78           | –     | –     | –                      | –      | –      | –                     | –     | –     | –    | 12    | 22.94 | 2.28 |
|                 |                      | females         | 7      | 154.61 | 7.34           | –     | –     | –                      | –      | –      | –                     | –     | –     | –    | 7     | 23.07 | 2.47 |
| All Pygmies     | all                  | 115             | 153.21 | 7.06   | 107            | 79.54 | 3.21  | 107                    | 0.5204 | 0.0151 | 107                   | 73.41 | 4.95  | 114  | 20.13 | 2.18  |      |
|                 | males                | 73              | 155.67 | 6.55   | 67             | 80.62 | 2.92  | 67                     | 0.5185 | 0.0152 | 67                    | 74.97 | 4.91  | 73   | 20.16 | 1.95  |      |
|                 | females              | 42              | 148.95 | 5.82   | 40             | 77.75 | 2.89  | 40                     | 0.5235 | 0.0147 | 40                    | 70.81 | 3.84  | 41   | 20.06 | 2.56  |      |
| All Non-Pygmies | all                  | 44              | 159.09 | 8.39   | 25             | 80.10 | 4.21  | 25                     | 0.5113 | 0.0143 | 25                    | 76.60 | 4.97  | 44   | 21.58 | 2.94  |      |
|                 | males                | 16              | 167.21 | 4.61   | 4              | 86.13 | 1.28  | 4                      | 0.5108 | 0.0143 | 4                     | 82.65 | 5.85  | 16   | 22.31 | 2.63  |      |
|                 | females              | 28              | 154.45 | 6.23   | 21             | 78.96 | 3.51  | 21                     | 0.5115 | 0.0146 | 21                    | 75.44 | 3.97  | 28   | 20.16 | 3.07  |      |

**Table S2.** Consistency of *VEGAS* genes for P/NP categories with/without village covariates.

| Gene            | Genomic position |             | Number of SNPs | P/NP Categories |      |         |
|-----------------|------------------|-------------|----------------|-----------------|------|---------|
|                 | Chr              | Begin (bp)  |                | End (bp)        | None | Village |
| <i>DLGAP1</i>   | 18               | 3,496,029   | 4,455,266      | 165             | Yes  | Yes     |
| <i>GPC6</i>     | 13               | 93,879,077  | 95,060,273     | 111             | Yes  | Yes     |
| <i>MACROD2</i>  | 20               | 13,976,145  | 16,033,841     | 183             | Yes  | Yes     |
| <i>CACNA1C</i>  | 12               | 2,162,415   | 2,807,115      | 76              | Yes  | Yes     |
| <i>PPP2R2B</i>  | 5                | 145,969,066 | 146,461,083    | 24              |      | Yes     |
| <i>GP1BB</i>    | 22               | 19,704,742  | 19,712,297     | 6               | Yes  | Yes     |
| <i>CLDN10</i>   | 13               | 96,085,852  | 96,232,010     | 10              |      | Yes     |
| <i>IPO9</i>     | 1                | 201,657,383 | 201,798,687    | 16              | Yes  |         |
| <i>ANKHD1</i>   | 5                | 139,781,398 | 139,919,441    | 2               | Yes  |         |
| <i>EIF4EBP3</i> | 5                | 139,781,398 | 139,929,163    | 2               | Yes  |         |
| <i>RPS6KA2</i>  | 6                | 166,822,853 | 167,275,771    | 51              | Yes  |         |
| <i>PSMG3</i>    | 7                | 1,606,969   | 1,609,668      | 10              | Yes  |         |
| <i>ST7</i>      | 7                | 116,592,500 | 116,594,388    | 10              | Yes  |         |
| <i>ZNF32</i>    | 10               | 44,124,264  | 44,170,147     | 24              | Yes  |         |
| <i>KIRREL3</i>  | 11               | 126,293,395 | 126,870,766    | 357             | Yes  |         |

*EMMAX* analyses considered either no covariate (“None”) or village affiliation as a covariate (“Village”). “Yes” indicates comparisons in which the gene’s  $P_{\text{perm}}$  is significant. Genes present in **Table 3** are shown in **bold** and the comparisons in which their  $P_{\text{perm}}$  was significant are highlighted in grey.

**Table S3.** Consistency of significant *VEGAS* genes for height-associated traits with population-based covariates in addition to sex.

| Gene            | Genomic position |             | Number of SNPs | Standing Height |      |      | Sitting Height |      |      | Standing/Sitting Ratio |      |      | Subischial Leg Length |      |      |         |
|-----------------|------------------|-------------|----------------|-----------------|------|------|----------------|------|------|------------------------|------|------|-----------------------|------|------|---------|
|                 | Chr              | Begin (bp)  |                | End (bp)        | None | P/NP | Village        | None | P/NP | Village                | None | P/NP | Village               | None | P/NP | Village |
| <i>GPC6</i>     | 13               | 93,879,077  | 95,060,273     | 111             | Yes  | Yes  | Yes            | Yes  | Yes  |                        | Yes  | Yes  | Yes                   | Yes  | Yes  | Yes     |
| <i>DLGAP1</i>   | 18               | 3,496,029   | 4,455,266      | 165             | Yes  | Yes  | Yes            | Yes  | Yes  | Yes                    | Yes  | Yes  | Yes                   | Yes  | Yes  | Yes     |
| <i>MACROD2</i>  | 20               | 13,976,145  | 16,033,841     | 183             | Yes  | Yes  | Yes            | Yes  | Yes  | Yes                    | Yes  | Yes  | Yes                   | Yes  | Yes  |         |
| <i>CACNA1C</i>  | 12               | 2,162,415   | 2,807,115      | 76              | Yes  |      |                | Yes  | Yes  |                        | Yes  | Yes  |                       | Yes  | Yes  |         |
| <i>DSCAM</i>    | 21               | 41,384,342  | 42,219,039     | 75              | Yes  | Yes  | Yes            |      |      |                        | Yes  | Yes  | Yes                   | Yes  | Yes  | Yes     |
| <i>DPYD</i>     | 1                | 97,543,299  | 98,386,615     | 30              |      |      |                |      |      |                        | Yes  | Yes  | Yes                   | Yes  | Yes  | Yes     |
| <i>ERC2</i>     | 3                | 55,542,335  | 56,502,391     | 36              |      |      |                |      |      |                        |      | Yes  |                       | Yes  | Yes  | Yes     |
| <i>XXYLT1</i>   | 3                | 194,789,012 | 194,991,895    | 18              | Yes  | Yes  |                |      | Yes  |                        |      |      |                       |      |      |         |
| <i>MAGI2</i>    | 7                | 77,646,373  | 79,082,890     | 132             | Yes  | Yes  | Yes            | Yes  | Yes  | Yes                    |      |      |                       |      |      |         |
| <i>NRG1</i>     | 8                | 31,497,267  | 32,622,558     | 87              | Yes  |      |                | Yes  |      | Yes                    | Yes  | Yes  | Yes                   | Yes  | Yes  | Yes     |
| <i>FOXP3</i>    | 14               | 89,622,515  | 90,085,494     | 63              | Yes  | Yes  |                | Yes  | Yes  | Yes                    |      |      |                       |      |      |         |
| <i>RDH14</i>    | 2                | 18,735,988  | 18,770,846     | 10              |      | Yes  | Yes            |      |      |                        |      |      |                       |      |      |         |
| <i>NT5C1B</i>   | 2                | 18,735,988  | 18,770,846     | 10              |      | Yes  | Yes            |      |      |                        |      |      |                       |      |      |         |
| <i>NPPA</i>     | 1                | 11,900,375  | 11,907,673     | 618             |      |      |                | Yes  | Yes  | Yes                    |      |      |                       |      |      |         |
| <i>PACRG</i>    | 6                | 163,148,163 | 163,736,524    | 48              |      |      |                | Yes  | Yes  | Yes                    |      |      | Yes                   |      |      |         |
| <i>TNFRSF6B</i> | 20               | 62,289,162  | 62,330,051     | 24              |      |      |                | Yes  | Yes  |                        |      |      |                       |      |      |         |
| <i>ZNF32</i>    | 10               | 44,124,264  | 44,170,147     | 24              |      |      |                |      |      |                        | Yes  | Yes  |                       |      |      |         |
| <i>SHANK2</i>   | 11               | 70,313,960  | 70,935,808     | 27              |      |      |                |      |      |                        |      |      |                       |      | Yes  |         |
| <i>CCDC169</i>  | 13               | 36,742,344  | 36,871,992     | 8               |      |      |                |      |      |                        |      |      |                       | Yes  | Yes  |         |
| <i>EGFLAM</i>   | 5                | 38,258,510  | 38,465,582     | 27              | Yes  |      | Yes            |      |      |                        |      |      |                       |      |      |         |
| <i>DISC1</i>    | 1                | 231,664,398 | 232,177,019    | 26              | Yes  |      |                |      |      |                        |      |      |                       |      |      |         |
| <i>ADIPOQ</i>   | 3                | 186,560,462 | 186,576,252    | 32              | Yes  |      |                |      |      |                        |      |      |                       |      |      |         |
| <i>LNX1</i>     | 4                | 54,326,436  | 54,457,753     | 33              | Yes  |      |                |      |      |                        |      |      |                       |      |      |         |
| <i>RPS6KA2</i>  | 6                | 166,822,853 | 167,275,771    | 51              | Yes  |      |                |      |      |                        |      |      |                       |      |      |         |
| <i>LMCD1</i>    | 3                | 8,262,833   | 8,543,344      | 26              |      |      |                | Yes  |      | Yes                    |      |      |                       |      |      |         |
| <i>IL12A</i>    | 3                | 159,631,189 | 159,924,879    | 16              |      |      |                | Yes  |      |                        |      |      |                       |      |      |         |
| <i>COL18A1</i>  | 21               | 46,825,096  | 46,933,634     | 12              |      |      |                | Yes  |      |                        |      |      |                       |      |      |         |
| <i>GDNF</i>     | 5                | 37,812,778  | 37,839,782     | 12              |      |      |                |      |      | Yes                    |      |      |                       |      |      |         |
| <i>INHBA</i>    | 7                | 41,728,600  | 41,742,706     | 4               |      |      |                |      |      | Yes                    |      |      |                       |      |      |         |
| <i>ARHGAP5</i>  | 14               | 32,544,624  | 32,545,905     | 4               |      |      |                |      |      |                        | Yes  |      |                       |      |      |         |
| <i>CNTN4</i>    | 3                | 2,140,549   | 3,099,645      | 58              |      |      |                |      |      |                        |      |      | Yes                   |      |      |         |
| <i>LHFPL3</i>   | 7                | 103,969,103 | 104,549,003    | 60              |      |      |                |      |      |                        |      |      | Yes                   |      |      |         |
| <i>PDX1</i>     | 13               | 28,403,895  | 28,495,541     | 22              |      |      |                |      |      |                        |      |      |                       | Yes  |      |         |
| <i>OSBPL10</i>  | 3                | 31,702,316  | 32,023,342     | 10              |      |      |                |      |      |                        |      |      |                       |      |      | Yes     |
| <i>RAD51</i>    | 15               | 40,985,952  | 40,987,303     | 2               |      |      |                |      |      |                        |      |      |                       |      |      | Yes     |

Sex was included as a covariate either on its own (“None”) or in combination with Pygmy/non-Pygmy categorization (“P/NP”) or village affiliation (“Village”). “Yes” indicates comparisons in which the gene’s  $P_{perm}$  is significant. Genes present in **Table 4** are shown in **bold** and the comparisons in which their  $P_{perm}$  was significant are highlighted in grey.
